## The Non-invasive Determination of Cardiac Output in Children: A Three-breath Technique

William D. Morton, M.D., F.R.C.P.C.\*

In this study, the cardiac output of 11 children (5 days to 18 yr of age) was measured following cardiopulmonary bypass. Standard dye dilution cardiac outputs and an indirect Fick- $\text{CO}_2$  technique were simultaneously determined. A rebreathing maneuver is described to estimate the oxygenated mixed venous  $\text{P}_{\text{CO}_2}$  ( $\text{PvCO}_2$ ). This estimate of  $\text{PvCO}_2$  was combined with the end tidal  $\text{P}_{\text{CO}_2}$  and  $\text{CO}_2$  production to give a non-invasive Fick estimate of the cardiac output. Non-invasive cardiac outputs correlated well with those measured by dye-dilution ( $r^2 = 0.94$ ) over a range of cardiac outputs from 490–7280 ml/min. All non-invasive determinations were within 15% of the line of identity, and within 22% of averaged replicate dye-dilution values. Our results agree with previous comparisons of indirect Fick- $\text{CO}_2$  methods with invasive determinations of cardiac output. These data suggest that the indirect Fick- $\text{CO}_2$  technique offers a rapid, non-invasive alternative to invasive monitoring of cardiac output. (Key words: Anesthesia, pediatrics. Measurement technique, cardiac output: non-invasive.)

IN 1956, COLLIER<sup>1</sup> DESCRIBED a rebreathing technique to estimate the mixed venous  $\text{P}_{\text{CO}_2}$ . Collier's "oxygenated"  $\text{PvCO}_2$  is defined as the mixed venous  $\text{P}_{\text{CO}_2}$  measured in the presence of oxygen saturated hemoglobin. With Collier's technique, a patient rebreathes a gas mixture with a  $\text{CO}_2$  partial pressure greater than the estimated  $\text{PvCO}_2$  to obtain an equilibrium  $\text{PvCO}_2$  estimate. Defares<sup>2</sup> subsequently reported  $\text{PvCO}_2$  estimates based on the asymptotic rise in  $\text{P}_{\text{CO}_2}$  during rebreathing. Refinements of the equilibrium and exponential techniques have been used to determine cardiac output by the indirect Fick- $\text{CO}_2$  method.<sup>3-7</sup>

Our initial attempts to reproduce stable estimates of  $\text{PvCO}_2$  by the equilibrium method were unsuccessful in small ( $\leq 5.3$  kg) subjects. Equilibration of  $\text{CO}_2$  could not be obtained within three breaths, inspired and expired gas varied by more than 1 mmHg, and a plateau could not be sustained for 10 s.<sup>8</sup> On the other hand, these criteria for an adequate equilibrium capnogram were easily replicated in larger subjects.

In this paper, we present a technique to estimate the oxygenated mixed venous  $\text{P}_{\text{CO}_2}$  ( $\text{PETCO}_2$ ) in both large

and small subjects. To reproducibly determine the  $\text{PvCO}_2$  in both large and small subjects, we combined a controlled-rebreathing technique described by Fisher,<sup>9</sup> with an equilibrium rebreathing approach. Our modification allows the inspired  $\text{P}_{\text{CO}_2}$  to equilibrate toward the expired  $\text{P}_{\text{CO}_2}$  during rebreathing. In contrast, Fisher's technique rigidly controls the inspired  $\text{P}_{\text{CO}_2}$ . We calculated cardiac output combining the indirect Fick- $\text{CO}_2$  technique with this estimate of  $\text{PvCO}_2$ , the end-tidal  $\text{P}_{\text{CO}_2}$  ( $\text{PETCO}_2$ ), and  $\text{CO}_2$  production ( $\dot{\text{V}}\text{CO}_2$ ). These indirect Fick- $\text{CO}_2$  cardiac outputs were compared with simultaneous dye-dilution determinations.

### Materials and Methods

The study was approved by the hospital Human Subject Review Committee. We studied 11 patients weighing 2.8–43 kg, aged 5 days–18 yr following elective surgical repair of congenital heart disease. One patient with a residual postoperative left-to-right intracardiac shunt was excluded. All cardiac outputs were measured 1–2 h after patients were transferred to the intensive care unit.

All patients were ventilated by a Siemens 900-C ventilator. We measured  $\dot{\text{V}}\text{CO}_2$  continuously with a Siemens model 930  $\text{CO}_2$  analyzer. This  $\text{CO}_2$  analyzer determines  $\dot{\text{V}}\text{CO}_2$  by integrating the product of the instantaneous expiratory flow and the instantaneous expired  $\text{P}_{\text{CO}_2}$ .  $\dot{\text{V}}\text{CO}_2$  was recorded when the  $\dot{\text{V}}\text{CO}_2$  measurement was stable for at least 30 s immediately before the cardiac output determination. Inspiratory and expiratory volumes were compared by a pitot tube flowmeter<sup>10</sup> to assure no endotracheal tube leaks.

A Puritan-Bennett  $\text{CO}_2$  analyzer (response time of 200 msec at 150 ml/min flow rate) equipped with a graph recorder was calibrated with dry 5.17%  $\text{CO}_2$  before each study.  $\text{PETCO}_2$  and all rebreathing  $\text{CO}_2$  measurements were sampled from a 19-gauge catheter positioned near the distal tip of the endotracheal tube.

Pulmonary blood flow (PBF) was determined from the Fick equation:

$$\text{PBF}(\text{ml}/\text{min}) = \frac{\dot{\text{V}}\text{CO}_2(\text{mlCO}_2/\text{min})}{\text{CvCO}_2 - \text{CaCO}_2(\text{mlCO}_2/\text{ml})},$$

where  $\dot{\text{V}}\text{CO}_2$  = production of  $\text{CO}_2$ ,  $\text{CvCO}_2$  =  $\text{CO}_2$  content of mixed venous blood, and  $\text{CaCO}_2$  =  $\text{CO}_2$  content of arterial blood. Distal  $\text{PETCO}_2$  measurements were used to estimate arterial  $\text{P}_{\text{CO}_2}$  ( $\text{PaCO}_2$ ).<sup>11</sup> If arterial

\* Lecturer, University of Toronto; Staff Anaesthetist, The Hospital for Sick Children.

Received from the Department of Anesthesia and the Research Institute, The Hospital for Sick Children and University of Toronto, Toronto, Ontario. Accepted for publication March 15, 1988. Supported in part by a grant from the University of Toronto (#3-336-269-50).

Address reprint requests to Dr. Morton: Department of Anaesthesia, St. Joseph's Hospital, 50 Charlton Avenue E., Hamilton, Ontario, Canada L8N 4A6.

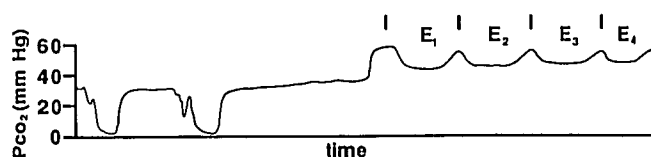

FIG. 1. Capnograph of a single rebreathing maneuver in a 7.2-kg child.  $PiCO_2 = 60$  mmHg. The plateau after the third expired breath ( $E_3$ ) was used to calculate  $PvCO_2$  as described in the text. The discontinuity in the ventilated breath at the left of the figure resulted from a brief ventilator disconnection and an attempt at spontaneous ventilation by the patient.

blood gases were not available, a Nellcor® pulse oximeter was used to measure  $O_2$  saturation.

To measure  $PvCO_2$ , a closed 2-liter reservoir bag was filled from an anesthesia machine equipped with Quantiflex®  $CO_2$  and  $O_2$  flowmeters. The  $P_{CO_2}$  of the delivered mixture ( $PiCO_2$ ) was analyzed immediately before the rebreathing maneuver. The endotracheal tube of each patient was disconnected from the ventilator and the patients were allowed to rebreathe for at least four breaths a test gas of 6–9%  $CO_2$  in oxygen. During rebreathing, the ventilator frequency and volume was manually approximated. The expired  $P_{CO_2}$  ( $PEXCO_2$ ) following the second, third, and fourth breaths was recorded (fig. 1). This rebreathing maneuver was repeated two to five times with different concentrations of test gas, allowing at least 1 min before repetition. When  $PEXCO_2 - PiCO_2$  was plotted as a function of  $PiCO_2$ , a least-squares linear regression was obtained (fig. 2). The x-intercept ( $PEXCO_2 = PiCO_2$ ) was used as an estimate of  $PvCO_2$ . This modification of Fisher's technique allows the  $PiCO_2$  to equilibrate toward  $PvCO_2$  during the rebreathing trial.

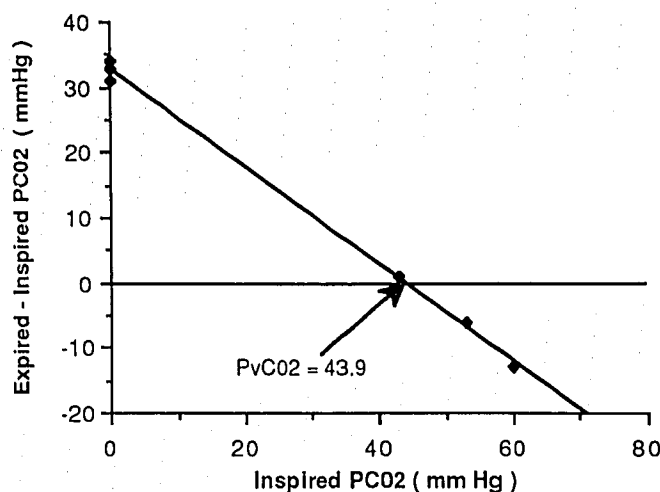

FIG. 2.  $PvCO_2$  estimation in a 7.2-kg child. A least-squares regression line is shown. Three separate rebreathing maneuvers produced the three points at the right of the figure. The  $PETCO_2$  (where  $PiCO_2 = 0$ ) is shown on the ordinate.

$CO_2$  contents were calculated from McHardy's<sup>12</sup> mathematical derivation of the  $CO_2$  dissociation curve. Corrections were applied for  $O_2$  saturation and hemoglobin concentration.

$$CvCO_2 - CaCO_2 = 11.02(PvCO_2^{0.996} - PaCO_2^{0.996})$$

$$- 0.015(PvCO_2 - PaCO_2)(15 - Hb)$$

$$- 0.064(95 - SaO_2),$$

where  $CvCO_2 - CaCO_2$  is the mixed venous-arterial  $CO_2$  content difference in ml of  $CO_2/100$  ml of blood,  $PvCO_2$  is the oxygenated mixed venous tension of  $CO_2$  in mmHg,  $PaCO_2$  is approximated by  $PETCO_2$ ,  $SaO_2$  is the percent  $O_2$  saturation of arterial blood, and Hb is the hemoglobin concentration in gm/100 ml blood.

Dye dilution cardiac outputs were determined immediately after the indirect-Fick cardiac outputs. Cardio-green dye (1.25–5.0 mg) was rapidly injected into a superior vena caval catheter or left atrial catheter at end-exhalation. A Waters COR-10 cardiac output computer continuously analyzed arterial blood and integrated the resultant dye-dilution curves. Indirect Fick- $CO_2$  cardiac outputs and dye-dilution outputs were compared by linear regression analysis.

In a parallel study, the oxygenated  $PvCO_2$  was determined in 12 subjects (2.8–84 kg) using both the equilibrium technique<sup>8</sup> and our three-breath method.

## Results

Table 1 shows the demographic profile of our patients, including indirect-Fick and dye-dilution cardiac output determinations. The two-, three-, and four-breath cardiac outputs were calculated from the  $PvCO_2 - PETCO_2$  gradient as described using  $PEXCO_2$  after the second, third, and fourth breath.

The correlation between two-, three-, and four-breath Fick cardiac outputs and dye-dilution cardiac outputs was best using the three-breath maneuver ( $r^2 = 0.87, 0.94$ , and  $0.90$ , respectively). Figure 3 shows the concordance plot of three-breath Fick- $CO_2$  cardiac outputs with simultaneous dye-dilution determinations. All Fick outputs were within 22% of the averaged dye-dilution values.

We found the three-breath technique gave estimates of  $PvCO_2$  2–4 mmHg lower than the equilibrium method. Figure 4 shows the correlation between the three-breath  $PvCO_2$  determination and the equilibrium values ( $r^2 = 0.91$ ) in 12 subjects. The difference between the two estimates of  $PvCO_2$  did not vary with weight ( $r^2 = 0.29$ ). Seven patients in the cardiac output study had rebreathing capnograms with a plateau allowing equilibrium estimates of  $PvCO_2$ . The mean equilibrium—three-breath  $PvCO_2$  difference was  $3.93 \pm 1.51$  mmHg ( $\pm SD$ ) in this group.

TABLE 1. Demographic and Cardiac Output Data

| Patient   | Weight (kg) | Age      | Lesion                                                 | vCO <sub>2</sub><br>(ml CO <sub>2</sub> /min) |             | Hb<br>(g/l) | Oxygen<br>Saturation<br>(%) | Number of<br>Re-breathing<br>Replicates | Calculated Cardiac Output<br>(ml/min) After 'n'<br>Expired Breaths |       |       | Mean Dye-<br>dilution<br>Cardiac<br>Output<br>(ml/min)<br>(n = 3) |
|-----------|-------------|----------|--------------------------------------------------------|-----------------------------------------------|-------------|-------------|-----------------------------|-----------------------------------------|--------------------------------------------------------------------|-------|-------|-------------------------------------------------------------------|
|           |             |          |                                                        | (ml/min)                                      | (ml/kg/min) |             |                             |                                         | n = 2                                                              | n = 3 | n = 4 |                                                                   |
| A         | 7.17        | 8 months | VSD                                                    | 59                                            | 8.2         | 152         | 100                         | 3                                       | 1130                                                               | 1030  | 940   | 1270                                                              |
| B (Day 1) | 12.6        | 3.5 yr   | Tetralogy of Fallot                                    | 86                                            | 6.8         | 115         | 98.8                        | 2                                       | 3490                                                               | 2530  | 2340  | 2030                                                              |
| B (Day 2) |             |          |                                                        | 96                                            | 7.6         | 103         | 100                         | 2                                       | 2110                                                               | 2060  | 1420  | 2000                                                              |
| C         | 39.4        | 14 yr    | Aortic aneurysm                                        | 190                                           | 4.8         | 110         | 100                         | 2                                       | 6070                                                               | 5640  | 5020  | 7280                                                              |
| D         | 2.8         | 5 days   | Transposition of<br>great arteries                     | 24                                            | 8.6         | 100         | 90                          | 3                                       | 420                                                                | 380   | 350   | 490                                                               |
| E         | 34.1        | 9 yr     | VSD                                                    | 205                                           | 6.0         | 125         | 100                         | 2                                       | 5720                                                               | 4660  | 4440  | 4350                                                              |
| F         | 43.3        | 18 yr    | Glenn shunt-<br>defect (tetralogy<br>repaired in past) | 230                                           | 5.3         | 139         | 82                          | 5                                       | 7750                                                               | 6430  | 5820  | 6340                                                              |
| G         | 13.4        | 3.5 yr   | AVSD                                                   | 74                                            | 5.5         | 98          | 100                         | 2                                       | 2110                                                               | 1920  | 1690  | 1680                                                              |
| H         | 35.4        | 13 yr    | Tetralogy of Fallot                                    | 205                                           | 5.8         | 120         | 100                         | 2                                       | 4980                                                               | 4220  | 3900  | 3900                                                              |
| I         | 10.7        | 1 month  | ASD Type I                                             | 94                                            | 8.8         | 135         | 100                         | 2                                       | 2180                                                               | 2060  | 1910  | 1730                                                              |
| J         | 19.9        | 5 yr     | ASD                                                    | 123                                           | 6.2         | 103         | 100                         | 3                                       | 3660                                                               | 3080  | 2810  | 2480                                                              |

## Discussion

We describe a rapid, practical method to non-invasively determine cardiac output of small subjects. Previously described non-invasive Fick techniques rely on one of two methods to estimate PvCO<sub>2</sub>: 1) the equilibrium method of Collier as refined by McEnvoy *et al.*,<sup>8</sup> and 2) exponential methods. In infants, rapid CO<sub>2</sub> recirculation yields a rebreathing capnograph that does not rise to an asymptotic value of PvCO<sub>2</sub>; despite altering rebreathing bag volumes, a continuous rising P<sub>CO<sub>2</sub></sub> with persistent ventilatory oscillations is seen.

To estimate cardiac output using the three-breath determination of PvCO<sub>2</sub> described, arterial blood samples are not required. Although the blood-gas equilibrium

of alveolar CO<sub>2</sub> is a contentious issue,<sup>13</sup> at rest the normal PETCO<sub>2</sub>-PaCO<sub>2</sub> gradient has been measured to be -2.5 mmHg.<sup>8</sup> We found a similar gradient (-2 to -4 mmHg) between the three-breath estimate of PvCO<sub>2</sub> and the equilibrium estimate in our study. The Fick cardiac outputs based on the equilibrium PvCO<sub>2</sub>-PaCO<sub>2</sub> gradient should, therefore, be expected to be similar to those based on a three-breath PRBCO<sub>2</sub>-PETCO<sub>2</sub> gradient.

As pulmonary dead space increases, the Collier estimate of PvCO<sub>2</sub> is not affected, since alveolar, end-tidal, and dead space gas should be in equilibrium. If dead space is increased, a large PETCO<sub>2</sub>-PaCO<sub>2</sub> gradient and, therefore, an artifactually low cardiac output will result if the PvCO<sub>2</sub>-PETCO<sub>2</sub> gradient is calculated using the

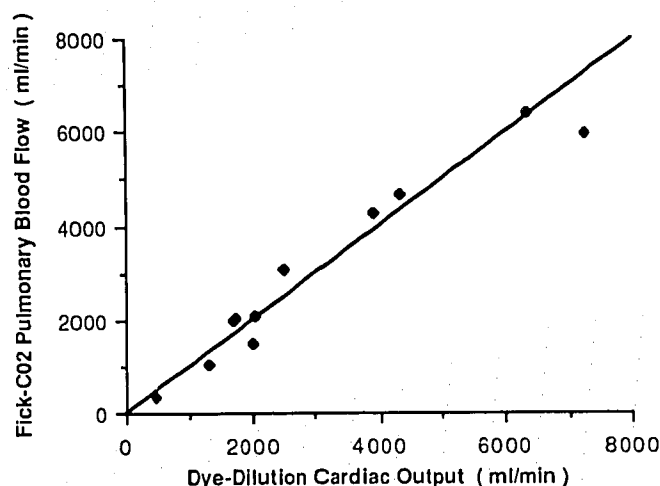

FIG. 3. A concordance plot showing the correlation between non-invasive Fick and dye-dilution determinations of cardiac outputs ( $r^2 = 0.94$ ). The line of identity is shown.

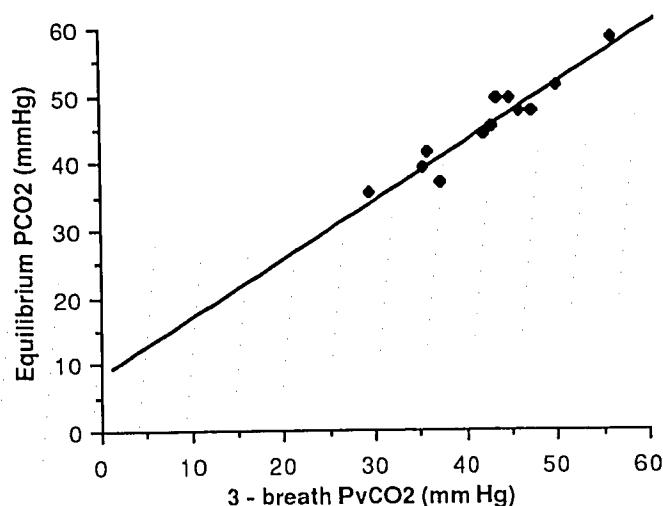

FIG. 4. Least squares regression plot of PvCO<sub>2</sub> as determined by the equilibrium and three-breath technique ( $r^2 = 0.91$ ). The regression line is represented by the curve  $y = 0.886x + 8.039$ .

equilibrium method.<sup>14</sup> The concordance of our Fick- $\text{CO}_2$  and dye dilution cardiac outputs indicates that the three-breath  $\text{PRBCO}_2$ - $\text{PETCO}_2$  gradient accurately reflects the  $\text{PvCO}_2$ - $\text{PaCO}_2$  gradient. We speculate that the same factors that lead to an increased  $\text{PETCO}_2$ - $\text{PaCO}_2$  gradient also increase the three-breath  $\text{PRBCO}_2$ - $\text{PvCO}_2$  gradient, and yield accurate pulmonary blood flow determinations.

If this assertion is correct, we would expect that the three-breath technique will estimate the effective pulmonary blood flow (which will ordinarily equal the systemic cardiac output), will be resistant to error resulting from increased dead space (for example, rapid shallow respirations), and will underestimate the actual pulmonary blood flow in states with increased venous admixture (pulmonary hypotension or pulmonary embolism). Our finding that PBF can be rapidly, non-invasively estimated within 22% of dye-dilution methods suggests that this technique will be clinically useful.

The author gratefully acknowledges the assistance of Ms. Shue Lin Loo in the preparation of this manuscript.

### References

1. Collier CR: Determination of mixed venous  $\text{CO}_2$  tensions by rebreathing. *J Appl Physiol* 9:25-29, 1956
2. Defares JG: Determination of  $\text{PvCO}_2$  from the exponential  $\text{CO}_2$  rise during rebreathing. *J Appl Physiol* 13:159-164, 1958
3. Defares JG, Wise ME, Duyaff JW: New indirect Fick procedure for the determination of cardiac output. *Nature* 192:760-761, 1961
4. Muiresan G, Sorbini CA, Solinas E, Grassi V, Casucci G, Petz E: Comparison of  $\text{CO}_2$ -rebreathing and direct Fick methods for determining cardiac output. *J Appl Physiol* 24:424-429, 1968
5. Farhi LE, Nesarajah MS, Olszowska AJ, Metildi LA, Ellis AK: Cardiac output determination by simple one-step rebreathing technique. *Respir Physiol* 28:141-159, 1976
6. Davis CC, Jones NL, Sealey BJ: Measurements of cardiac output in seriously ill patients using a  $\text{CO}_2$  rebreathing method. *Chest* 73:167-172, 1978
7. Roy RJ, Capek J: Noninvasive cardiac output monitoring using partial  $\text{CO}_2$  rebreathing (abstract). *ANESTHESIOLOGY* 63:A172, 1985
8. McEvoy JDS, Jones NC, Campbell EJM: The mixed venous and arterial  $\text{pCO}_2$ . *Br Med J* 4:687-690, 1974
9. Fisher JA, Ansel C: A new approach to non-invasive oxygenated mixed venous  $\text{PCO}_2$  (abstract). *Clin Invest Med* 9:A24, 1986
10. Wolf AR, Volgyesi GA: A modified Pitot tube for the accurate measurement of tidal volume in children. *ANESTHESIOLOGY* 67:775-778, 1988
11. Badgwell JM, Heavner JE, May WS, Goldthorn JF, Lerman J: End-tidal  $\text{P}_{\text{CO}_2}$  monitoring in infants and children ventilated with either a partial rebreathing or a non-rebreathing circuit. *ANESTHESIOLOGY* 66:405-410, 1987
12. McHardy GJR: Relationship between the difference in pressure and content of carbon dioxide in arterial and venous blood. *Clin Sci* 32:299-309, 1967
13. Piiper J: Blood-gas equilibrium of carbon dioxide in lungs: A continuing controversy. *J Appl Physiol* 60:1-8, 1986
14. Mahler DA, Matthay RA, Snyder PE, Neff Rk, Loke J: Determination of cardiac output at rest and during exercise by carbon dioxide rebreathing method in obstructive airway disease. *Am Rev Respir Dis* 131:73-78, 1985
